# Supplementary material for: Aegle marmelos Leaf Extract Phytochemical Analysis, Cytotoxicity, In Vitro Antioxidant and Antidiabetic Activities
Source: MDPI journal article supplement (doi:10.3390/plants10122573), 2021-11-25
Supplement: s1 [file s1]

**Supplementary Table S1:** Detailed instrumentation of GC/MS profiling.

| Instrument                     | Agilent                                                        |
|--------------------------------|----------------------------------------------------------------|
| Column                         | HP-5 <sub>MS</sub>                                             |
| <b>Experimental condition</b>  |                                                                |
| Inlet temperature              | 250°C                                                          |
| Injection mode                 | Split (1:5)                                                    |
| Carrier gas                    | Helium                                                         |
| <b>Oven</b>                    |                                                                |
| Initial temperature            | 50°C for 2 min                                                 |
| Ramp                           | 10°C/min. to 200°C for 5 min,<br>5°C/min. to 250°C for 10 min. |
| Final temperature              | 250°C hold for 10 min.                                         |
| <b>Injection</b>               |                                                                |
| Injection temperature          | 250°C                                                          |
| Split flow                     | 7.5 ml/min.                                                    |
| Auxillary temperature          | 250°C                                                          |
| <b>Detector</b>                |                                                                |
| Type                           | MS                                                             |
| Detector interface temperature | 250°C                                                          |
| Ionization                     | EI                                                             |
| Scan mode                      | Full scan, m/z 50-700                                          |
